# Supplementary material for: Large-scale data reporting of paediatric morbidity and mortality in developing countries: it can be done
Source: PubMed Central journal article supplement — Arch Dis Child. 2015 Oct 21;101(4):392–7. doi: 10.1136/archdischild-2015-309353 (PMC4819636; doi:10.1136/archdischild-2015-309353), 2015-10-21
Supplement: archdischild-2015-309353-s1.pdf [file archdischild-2015-309353-s1.pdf]

Date of admission  Hospital number

Name

DOB  Age  Sex  
 M  
 F

Province

District

Village

Outcome  
 Survived to hospital discharge  Transferred out  Died  Absconded

Nutritional state  
 Wt  kg  
 Weight for age greater than -2 standard deviations (good weight)  
 Weight for age between -2 and -3 standard deviations (underweight)  
 Weight for age less than -3 standard deviations (severely underweight)

**Respiratory**

Pneumonia - severe  Bronchiolitis  Croup  Asthma  Acute otitis media  Respiratory other  
 Pneumonia - non severe  Whooping cough  Bronchiectasis  Chronic serous otitis media

**Gastrointestinal**

Acute watery diarrhoea  Dysentery  Malnutrition - Marasmus / kwashiorkor  Iron deficiency  Beri beri  
 Persistent diarrhoea  Cholera  Bottle fed  Typhoid  Hepatitis  
 Vitamin A deficiency  Pigbel

**Acute rash and fever**

Severe sepsis / shock (including bacteraemia)  Rubella  Rickettsia  Dengue fever  Dengue Haemorrhagic fever  
 Measles  Chickenpox  Melioid  Dengue shock syndrome  Rheumatic fever

**Skin, bone and joint infection**

Cellulitis (skin sepsis)  Septic arthritis (joint infection)  
 Osteomyelitis (bone infection)  Pyomyositis / fasciitis (muscle infection or abscess)

**Malaria**

Uncomplicated malaria  Malaria with seizures  
 Malaria - severe / complicated (severe anaemia, acute renal failure, pulmonary oedema)  Cerebral malaria

**Neurological**

Febrile convulsions  Cerebral palsy  
 Subacute Sclerosing Panencephalitis (SSPE)  
 Epilepsy  
 Acute flaccid paralysis  
 Hydrocephalus

**Meningitis**

Meningitis - Haemophilus influenzae  
 Meningitis - Streptococcus pneumoniae  
 Meningitis - Neisseria meningitidis  
 Cryptococcal meningitis  
 Meningitis - no cause identified

**Encephalitis**

Japanese encephalitis  
 Encephalitis-other

**Tuberculosis**

Pulmonary TB  Bone and joint TB (including Potts disease of the spine)  TB pericardial effusion  
 TB meningitis  Abdominal TB  Disseminated TB (including miliary TB)  
 Lymph node TB  Miliary TB  Proven Multi-drug resistant TB (MDRTB)

**Emergency / Surgical**

Appendicitis  Poisoning  Tetanus  
 Bowel obstruction  Snakebite

**Trauma / Injury**

Burns  Trauma  
 Drowning

**Heart disease**

Heart disease - congenital  
 Heart disease - rheumatic

**Cancer**  Wilms Tumour  Leukaemia  Lymphoma  Retinoblastoma  CNS tumour  Neuroblastoma

**Renal**

Urinary tract infection  Glomerulonephritis  
 Nephrotic syndrome  Renal tubular acidosis

**Haematology**

Thalassemia  
 Sickle-cell anaemia

**Endocrine**

Type 1 Diabetes  
 Thyroid disease

**Child protection**  Physical abuse  Sexual abuse  Neglect

**Adopted**  Yes  No

**Neonates****Prematurity < 37 wks**

Yes  No

**Birth Weight**

1500 - 2500 grams  
 1000 - 1499 grams  
 <1000 grams

**Neonatal infections**

Pneumonia  Congenital rubella syndrome  
 Meningitis  Neonatal tetanus  
 Cord sepsis  Diarrhoea  
 Skin sepsis  Neonatal infection - other  
 Congenital syphilis  
 Congenital malaria

**Congenital malformations**

Congenital heart disease  Congenital malformation  
 Hirschsprungs disease  Imperforate anus  
 Malrotation

**Neonatal Conditions**

Birth asphyxia / meconium aspiration  Jaundice  
 Respiratory distress syndrome (RDS)  Bowel obstruction
