# Supplementary material for: Large-scale data reporting of paediatric morbidity and mortality in developing countries: it can be done
Source: PubMed Central journal article supplement — Arch Dis Child. 2015 Oct 21;101(4):392–7. doi: 10.1136/archdischild-2015-309353 (PMC4819636; doi:10.1136/archdischild-2015-309353), 2015-10-21
Supplement: archdischild-2015-309353-s2.pdf [file archdischild-2015-309353-s2.pdf]

## Appendix 2

## Summary Sheet - SJNM -Kundiawa General Hospital

|                                      | Search from      | Search to    |                    |   |  |
|--------------------------------------|------------------|--------------|--------------------|---|--|
|                                      | 1/1/2013         | 31/12/2013   |                    |   |  |
|                                      | Total Admissions | Total Deaths | Case Fatality Rate |   |  |
| <b>Total</b>                         | 1868             | 132          | 7.1                | % |  |
| <b>Pneumonia</b>                     | 404              | 24           | 5.9                | % |  |
| Severe pneumonia                     | 142              | 20           | 14.1               | % |  |
| <b>Diarrohoea (all cases)</b>        | 373              | 14           | 3.8                | % |  |
| Dysentry                             | 54               | 6            | 11.1               | % |  |
| Cholera                              | 0                | 0            | ?                  | % |  |
| Typhoid                              | 52               | 0            | 0.0                | % |  |
| <b>Malaria</b>                       | 26               | 1            | 3.8                | % |  |
| <b>Anaemia</b>                       | 155              | 37           | 23.9               | % |  |
| <b>Meningitis (all cases)</b>        | 51               | 6            | 11.8               | % |  |
| <i>S. pneumonia meningitis</i>       | 8                | 1            | 12.5               | % |  |
| <i>H influenzae meningitis</i>       | 33               | 4            | 12.1               | % |  |
| <i>Neisseria meningitidis</i>        | 4                | 0            | 0.0                | % |  |
| Japanese encephalitis                | 0                | 0            | ?                  | % |  |
| Encephalitis other                   | 1                | 0            | 0.0                | % |  |
| <b>Severe sepsis (not neonatal)</b>  | 3                | 0            | 0.0                | % |  |
| <b>Dengue (all types)</b>            | 0                | 0            | ?                  | % |  |
| <b>Tuberculosis</b>                  | 191              | 22           | 11.5               | % |  |
| Pulmonary TB                         | 120              | 10           | 8.3                | % |  |
| Extra pulmonary TB                   | 71               | 12           | 16.9               | % |  |
| <b>HIV</b>                           | 21               | 6            | 28.6               | % |  |
| <b>Severe malnutrition</b>           | 200              | 48           | 24.0               | % |  |
| Iron deficiency                      | 6                | 1            | 16.7               | % |  |
| Vitamin A deficiency                 | 0                | 0            | ?                  | % |  |
| Beriberi (Thiamine deficiency)       | 0                | 0            | ?                  | % |  |
| <b>Vaccine preventable disease</b>   |                  |              |                    |   |  |
| Measles                              | 0                | 0            | ?                  | % |  |
| Whooping cough                       | 4                | 0            | 0                  | % |  |
| Tetanus                              | 3                | 1            | 33.3               | % |  |
| Acute Flaccid Paralysis              | 2                | 1            | 50                 | % |  |
| Pigbel                               | 15               | 1            | 6.7                | % |  |
| <b>Child protection</b>              | 0                | 0            | ?                  | % |  |
| <b>Cancer</b>                        | 9                | 1            | 11.1               | % |  |
| <b>ARF / Rheumatic heart disease</b> | 9                | 1            | 11.1               | % |  |
| <b>Neonatal</b>                      | 161              | 25           | 15.5               | % |  |
| Neonatal sepsis                      | 66               | 10           | 15.2               | % |  |
| Birth asphyxia                       | 71               | 8            | 11.3               | % |  |
| Very Low Birth Weight 1000g - 1500g  | 24               | 15           | 62.5               | % |  |
| Congenital heart disease             | 8                | 4            | 50.0               | % |  |
